8. Daga MK, Chaudhary M, Sharma B, Bhattacharjee J, Ghambhir DS, Arora N, Sudha R: Effect of esmolol on oxidant status and antioxidant activity in acute myocardial infarction. *J Assoc Physicians India* 2003; 51:677-80

9. Nguyen LT, Rebecchi MJ, Moore LC, Glass PS, Brink PR, Liu L: Attenuation

of isoflurane-induced preconditioning and reactive oxygen species production in the senescent rat heart. *Anesth Analg* 2008; 107:776-82

(Accepted for publication June 29, 2009.)

Anesthesiology 2009; 111:925

Copyright © 2009, the American Society of Anesthesiologists, Inc. Lippincott Williams & Wilkins, Inc.

**In Reply:**—We thank Drs. Xia and Irwin for their interest in our study on the role of  $\beta$ -adrenergic signaling in anesthetic postconditioning<sup>1</sup> and in the accompanying editorial view.<sup>2</sup> We agree with Drs. Xia and Irwin that, besides their energy-sparing effect, several alternative mechanisms of  $\beta$  blockers might be responsible for their infarct size-reducing capacity. Apart from their effect on the interaction between  $\beta$  receptor activation and reactive oxygen species production<sup>3</sup> and scavenging,<sup>4</sup>  $\beta$  blockers can inhibit calcium/calmodulin-dependent protein kinase II<sup>5</sup> and phospholipase A,<sup>6</sup> exert membrane stabilizing effects,<sup>7</sup> and may even have direct effects on mitochondrial electron transport and reactive oxygen species production.<sup>8</sup> The role of alternative mechanisms is certainly supported by the finding that infarct size reduction by  $\beta$  blockade is independent of heart rate, the main determinant of myocardial oxygen consumption.<sup>9</sup> It is entirely conceivable that the combination of different cardioprotective principles at different time points during reperfusion might provide additive protective effects. In this context, it is of interest that calcium/calmodulin-dependent protein kinase II is necessary for desflurane-induced postconditioning, whereas prolonged postischemic calcium/calmodulin-dependent protein kinase II blockade might attenuate adverse effects of ischemia/reperfusion injury, including remodeling.<sup>10</sup> Thus, it might be reasonable to apply anesthetic postconditioning at the onset of reperfusion and to initiate  $\beta$  blockade later during reperfusion. However, further basic research and clinical studies will be necessary to determine an optimized cardioprotective approach and to identify the possible clinical consequences of these experimental findings.

The rabbits used in this study were between 8 and 12 weeks of age and weighed between 2.5 and 3.0 kg. Although cardioprotection by ischemic<sup>11</sup> and pharmacological<sup>12</sup> preconditioning can be attenuated or lost in senescent hearts, there is some evidence of preserved ischemic postconditioning in the aged myocardium.<sup>13</sup> Thus, the impact of aging on the cardioprotective effects of  $\beta$  blockade, anesthetic postconditioning and their interaction with reactive oxygen species needs to be determined in future studies.

**Markus Lange, M.D.,\* Matthias L. Riess, M.D., Ph.D.** \*Klinikum der Bayerischen Julius-Maximilians-Universität, Würzburg, Germany. lange\_m@klinik.uni-wuerzburg.de

## References

1. Lange M, Redel A, Lotz C, Smul TM, Blomeyer C, Frank A, Stumpner J, Roewer N, Kehl F: Desflurane-induced postconditioning is mediated by beta-adrenergic signaling: role of beta 1- and beta 2-adrenergic receptors, protein kinase A, and calcium/calmodulin-dependent protein kinase II. *ANESTHESIOLOGY* 2009; 110:516-28
2. Riess ML: The rocky road from bench to bedside: Beta-blockers and anesthetic postconditioning. *ANESTHESIOLOGY* 2009; 110:451-2
3. Moniri NH, Daaka Y: Agonist-stimulated reactive oxygen species formation regulates beta2-adrenergic receptor signal transduction. *Biochem Pharmacol* 2007; 74:64-73
4. Srivastava S, Chandrasekar B, Gu Y, Luo J, Hamid T, Hill BG, Prabhu SD: Downregulation of CuZn-superoxide dismutase contributes to beta-adrenergic receptor-mediated oxidative stress in the heart. *Cardiovasc Res* 2007; 74:445-55
5. Lange M, Smul TM, Redel A, Lotz C, Jazbutyte V, Schnupp V, Roewer N, Kehl F: Differential role of calcium/calmodulin-dependent protein kinase II in desflurane-induced preconditioning and cardioprotection by metoprolol: Metoprolol blocks desflurane-induced preconditioning. *ANESTHESIOLOGY* 2008; 109:72-80
6. Trotz M, Jellison EJ, Hostetler KY: Propranolol inhibition of the neural phospholipase A of rat heart mitochondria, sarcoplasmic reticulum and cytosol. *Biochem Pharmacol* 1987; 36:4251-6
7. Boucher M, Chapuy E, Duchêne-Marullaz P: Membrane stabilizing activity and  $\beta$ -adrenoceptor antagonist-induced bradycardia in conscious dogs. *Eur J Pharmacol* 1992; 211:343-9
8. Kametani R, Miura T, Harada N, Shibuya M, Wang R, Tan H, Fukagawa Y, Kawamura S, Matsuzaki M: Carvedilol inhibits mitochondrial oxygen consumption and superoxide production during calcium overload in isolated heart mitochondria. *Circ J* 2006; 70:321-6
9. Wartier DC, Gross GJ, Jesmok GJ, Brooks HL, Hardman HF: Protection of ischemic myocardium: Comparison of effects of propranolol, bevantolol and N-dimethyl propranolol on infarct size following coronary artery occlusion in anesthetized dogs. *Cardiology* 1980; 66:133-46
10. Backs J, Backs T, Neef S, Kreusser MM, Lehmann LH, Patrick DM, Grueter CE, Qi X, Richardson JA, Hill JA, Katus HA, Bassel-Duby R, Maier LS, Olson EN: The delta isoform of CaM kinase II is required for pathological cardiac hypertrophy and remodeling after pressure overload. *Proc Natl Acad Sci USA* 2009; 106:2342-7
11. Fenton RA, Dickson EW, Meyer TE, Dobson JG: Aging reduces the cardioprotective effect of ischemic preconditioning in the rat heart. *J Mol Cell Cardiol* 2000; 32:1371-5
12. Sniecinski R, Liu H: Reduced efficacy of volatile anesthetic preconditioning with advanced age in isolated rat myocardium. *ANESTHESIOLOGY* 2004; 100:589-97
13. Lauzier B, Delemasure S, Debin R, Collin B, Sicard P, Acar N, Bretillon L, Joffe C, Bron A, Creuzot-Garcher C, Vergely C, Rochette L: Beneficial effects of myocardial postconditioning are associated with reduced oxidative stress in a senescent mouse model. *Transplantation* 2008; 85:1802-8

(Accepted for publication June 29, 2009.)

Anesthesiology 2009; 111:925-6

Copyright © 2009, the American Society of Anesthesiologists, Inc. Lippincott Williams & Wilkins, Inc.

## Goals Neither Validated Nor Met in Goal-directed Colloid versus Crystalloid Therapy

**To the Editor:**—Kimberger *et al.*<sup>1</sup> and the editors<sup>2</sup> are to be commended for attempting to shed light on an important topic: What is the optimal intraoperative fluid and resuscitation target?

Many experienced physicians, including us, who provide anesthesia for major intraabdominal surgery have evolved over time from crystal-

loid-only, “show me the proof” physicians to those being in philosophical agreement with both the author and the editorial writers—goal-directed therapy with colloid is best in intestinal cases. We believe this produces less gut edema without compromising gut or other critical organ perfusion (not to mention reducing the anesthesiologist’s aural discomfort from the oft repeated surgeon lament that the anesthesia team is “drowning” the patient). Indeed, Victor Hugo once said, “All the forces in the world are not so powerful as an idea whose time has come.”\*

Unfortunately, despite our hope to the contrary, all the forces in the world may have to wait a little longer, because this study does not

The above letter was sent to the authors of the referenced Editorial. The authors did not feel that a response was required. —James C. Eisenach, M.D., Editor-in-Chief.

\*Available at [http://famouspoetsandpoems.com/poets/victor\\_hugo/quotes](http://famouspoetsandpoems.com/poets/victor_hugo/quotes). Accessed May 29, 2009.
